# 1 **Phylogenetic scale in ecology and evolution**

2 **Catherine H. Graham** <sup>1</sup>, **Antonin Machac** <sup>2,3,4</sup>, **David Storch** <sup>3,4</sup>

3

4 <sup>1</sup>Department of Ecology and Evolution, 650 Life Sciences Bldg, Stony Brook University, Stony  
5 Brook, NY 11794, USA – <sup>2</sup>Center for Macroecology, Evolution, and Climate, Natural History  
6 Museum of Denmark, Universitetsparken 15, DK 2100 Copenhagen – <sup>3</sup>Department of Ecology,  
7 Vinicna 7, 12844 Prague 2, Czech Republic – <sup>4</sup>Center for Theoretical Study, Jilska 1, 11000 Prague  
8 1, Czech Republic.

9

10 Email contacts: CHG: [catherine.graham@stonybrook.edu](mailto:catherine.graham@stonybrook.edu), AM: [A.Machac@email.cz](mailto:A.Machac@email.cz), DS:  
11 [storch@cts.cuni.cz](mailto:storch@cts.cuni.cz). Author for correspondence: Catherine H. Graham, telephone (US 1-631-632-  
12 1962), fax (US 1-631-632-7626). Statement of authorship: The authors conceived and wrote the  
13 manuscript together, contributing equally.

14

15 Running title: Phylogenetic scale in ecology and evolution. Keywords: biogeography, community  
16 structure, diversification, domains of scale, extent, grain, macroecology, macroevolution, spatial  
17 scale. The text consists of 5200 words, 2 boxes (~420 words each), 1 figure, 1 table, 100 references

18

19

20

21

22

23 **SUMMARY** It has been widely acknowledged that many phenomena in ecology and evolution  
24 depend on spatial and temporal scale. However, important patterns and processes may vary also  
25 across the phylogeny and depend on phylogenetic scale. Though phylogenetic scale has been  
26 implicitly considered in some previous studies, it has never been formally conceptualized and its  
27 potential remains unexplored. Here, we develop the concept of phylogenetic scale and, building  
28 on previous work in the field, we introduce phylogenetic grain and extent, phylogenetic scaling  
29 and the domains of phylogenetic scale. We use examples from published research to demonstrate  
30 how phylogenetic scale has been considered so far and illustrate how it can inform, and possibly  
31 resolve, some of the longstanding controversies in evolutionary biology, community ecology,  
32 biogeography and macroecology. To promote the concept of phylogenetic scale empirically, we  
33 propose methodological guidelines for its treatment.

34  
35  
36  
37  
38  
39  
40  
41  
42  
43  
44  
45  
46  
47  
48  
49  
50  
51  
52

## 53 INTRODUCTION

54  
55 Numerous patterns in ecology and evolution vary across the phylogenetic hierarchy (Fig. 1).  
56 Species diversity declines with latitude across higher taxa but not necessarily across their  
57 constituent families and genera (Buckley *et al.* 2010) that also often conform to different  
58 diversification dynamics (Phillimore & Price 2008; Morlon *et al.* 2010; Rabosky *et al.* 2012).  
59 Phylogenetic delimitation of species pools determines our inferences about community assembly  
60 (Cavender-Bares *et al.* 2009). Many other, similar examples can further illustrate that patterns in  
61 ecology and evolution often depend on phylogenetic scale (Fig. 1). Yet, unlike the extensively  
62 developed and widely recognized concepts of spatial and temporal scale (e.g. Wiens 1989; Levin  
63 1992; Schneider 2001), phylogenetic scale remains largely unnoticed and its importance has only  
64 recently been emerging. Here, we formalize and develop the concept of phylogenetic scale,  
65 summarize how it has been considered across disciplines, and suggest further research directions.

66         Inspired by the concept of spatial scale (e.g. Wiens 1989; Levin 1992; Schneider 2001), we  
67 define phylogenetic scale in terms of phylogenetic grain and phylogenetic extent. Phylogenetic  
68 grain refers to the elementary unit of analysis, defined in terms of tree depth, taxonomic rank,  
69 clade age, or clade size. Phylogenetic extent refers to the entire phylogeny encompassing all these  
70 units (Box 1). The grain and extent of biological patterns might inform us about the mechanisms  
71 that produced these patterns. For example, the number of families in the fossil record seems to  
72 stay constant while the number of genera seems to increase continually over geological time,  
73 suggesting that different mechanisms produce genus-level and family-level diversity (Benton &  
74 Emerson 2007). In community ecology, clade-wide analyses typically suggest that communities  
75 have been shaped by environmental filters (Parra *et al.* 2011) while focused analyses of narrowly  
76 defined clades often uncover a suite of additional mechanisms (e.g. competition, mutualisms,  
77 dispersal limitation) (Parra *et al.* 2011; McGuire *et al.* 2014). Different patterns, and by extension  
78 different inferences about the underlying mechanisms, might therefore emerge across the  
79 continuum of phylogenetic scales.

80         The concept of phylogenetic scale seems particularly pertinent, given the growing body  
81 of research and statistical methods to explore the increasingly accurate and ever more complete  
82 phylogenetic data (e.g. phylogenetic comparative methods, community phylogenetics,

83 diversification analysis). Yet, few studies have extended the explorative strategies to  
84 systematically investigate phylogenetic scale-dependence (e.g. upscaling, downscaling), delimit  
85 phylogenetic domains of ecological theories (e.g. niche conservatism, competition and filtering,  
86 equilibrational diversification), or evaluate the universal laws of ecology (e.g. species-abundance  
87 distributions, latitudinal gradients). We therefore contend that the full potential of the  
88 phylogenetic data and the methods at hand has not yet been realized, and further progress might  
89 be precipitated by a more focused and formalized treatment of phylogenetic scale, akin to the one  
90 commonly applied across temporal and spatial scales (e.g. Wiens 1989; Levin 1992; Schneider  
91 2001).

92         Here, we summarize the variety of ways in which different disciplines have considered  
93 phylogenetic scale, highlighting their respective benefits and pitfalls. We further propose how  
94 these efforts might be consolidated under one conceptual and empirical framework that would  
95 provide the common ground for cross-disciplinary discussion. In particular, we define the  
96 concept of phylogenetic scale, distinguish between phylogenetic grain and extent, scale-  
97 dependence, phylogenetic scaling and the domains of scale. We also provide practical guidelines  
98 for the treatment of phylogenetic scale across empirical studies, using the data and statistical  
99 methods currently available. We hope this will inspire further discussion, draw more focused  
100 attention to the subject, and advance the notion of phylogenetic scale in ecology and evolution.

101

## 102 **PHYLOGENETIC SCALE IN ECOLOGY AND EVOLUTION**

103 Phylogenetic scale has been considered to varying degrees in ecology and evolution, from being  
104 largely neglected to being relatively well-developed. In this section, we describe previous  
105 research that has implicitly or explicitly considered phylogenetic scale but also how the core  
106 disciplines in the field might further benefit from this concept (e.g. macroevolution, community  
107 ecology, biogeography, macroecology).

108

109

110

111

112 **Figure 1.** Examples of patterns that vary across phylogenetic scales. (a) The latitudinal diversity  
113 gradient. Mammal diversity decreases with latitude across large clades but many other patterns  
114 emerge across small clades, including inverse ones (select clades depicted in black). (b) The  
115 dependence of population abundance on body mass. The dependence is negative across large  
116 phylogenetic scales (mammals depicted in grey) but varies substantially across small scales (select  
117 orders depicted in black). (c) Diversification dynamics. Slowdowns detected over some  
118 phylogenetic scales might be accompanied by accelerations over both larger and smaller scales.  
119 (d) Statistical correlations. Even though the depicted variables are negatively correlated within  
120 each of the two subclades, the correlation becomes positive when the subclades are studied  
121 together. The data (a, b) were taken from the IUCN (2016) and PanTHERIA (2016).

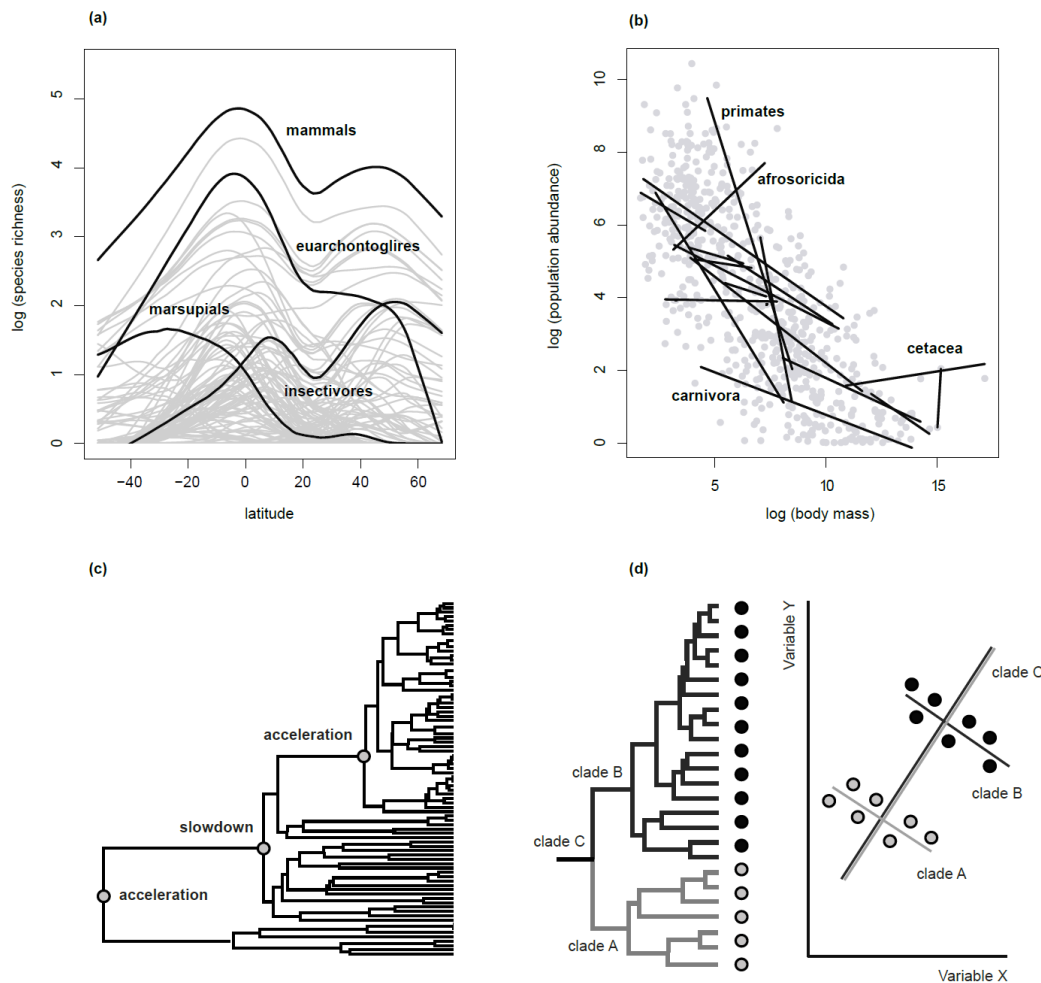

## 122 **BOX 1: The concept of phylogenetic scale**

123 The concept of scale is based on the fact that some entities can be ordered, or placed on a scale  
124 (*scala* means *ladder* in Latin). For example, continents contain biomes, ecoregions, and localities,  
125 giving rise to spatial hierarchy. Similarly, large clades contain small clades, creating phylogenetic  
126 hierarchy which defines phylogenetic scale. However, clades are not always nested, in which case  
127 standard measures might be needed to order the clades along the scale continuum. These  
128 measures might include time (clade age) but also clade size (number of species within a clade) or  
129 the degree of molecular, phenotypic, or ecological divergence within a clade. These measures will  
130 be inherently correlated across mutually nested clades but might become decoupled across non-  
131 nested clades (e.g. old clades will not necessarily be most diverse) (Box 2).

132 In the concept of spatial scale, **grain** and **extent** are usually distinguished. Grain refers to the area  
133 of the basic unit analyzed (e.g. ecoregion) while extent refers to the total area analyzed (e.g.  
134 continent). Phylogenetic scale can be defined analogously, such that phylogenetic grain refers to  
135 the basic unit of analysis (e.g. species, genera, families) and phylogenetic extent to the total  
136 phylogeny that would encompass all the units analyzed (e.g. class, phylum).

137

138

139

140

141

142

143

144

145

146

147

148

149

150

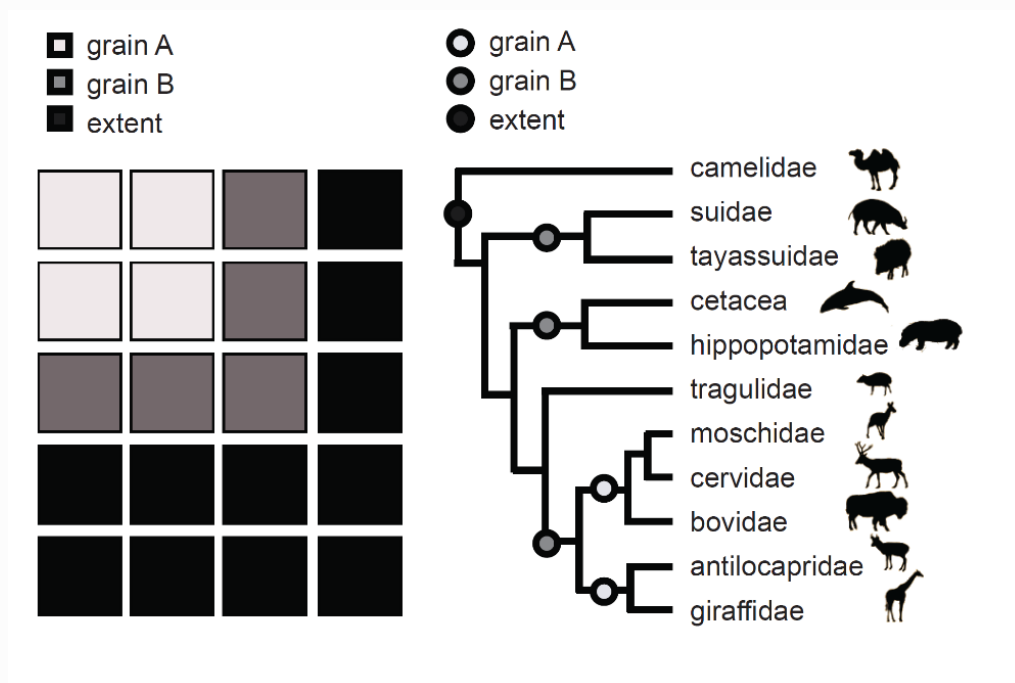

151 Even though taxonomic ranks are commonly used to define phylogenetic scale, they are not  
152 always comparable (e.g. genera in mammals are not comparable to genera in insects), and  
153 standard measures might be better suited to define phylogenetic scales across distant taxa (e.g.  
154 taxon age, taxon size), but even these measures might not ensure entirely that the analyzed taxa  
155 are fully comparable. For example, clade age might reflect the degree of phenotypic divergence  
156 across clades, but some clades might be more diverged than others despite being of similar age.  
157 The same limitations apply to the measures of spatial scale because spatial grains of standardized  
158 sizes might not ensure comparability across species of dramatically different geographic and  
159 home range sizes (Wiens 1989). Therefore, the most suitable measure and definition of the  
160 phylogenetic scale should be dictated by the biological properties of the organismal system (e.g.  
161 body size, generation time, rates of phenotypic evolution) and the question under study (e.g.  
162 phenotypic divergence, diversification dynamics, diversity patterns).  
163 In some cases, it may be useful to work with non-standardized grains which represent more  
164 natural units of analysis (e.g. islands in spatial scaling or island faunas in phylogenetic scaling).  
165 The extents will then be defined correspondingly, so as to cover all of the units analyzed (e.g. all  
166 islands or the entire biotas across islands). Finally, grain and extent are defined only in relation  
167 to each other. The grain from one study can therefore act as an extent in another study, or vice  
168 versa.

169

170

## 171 **Evolution and diversification**

172 Evolutionary diversification and disparification are known to vary across phylogenetic scales but  
173 have rarely been thoroughly studied in this context. Even though a suite of methods are  
174 commonly used to explore these processes across the phylogeny (e.g. Rabosky *et al.* 2012; Alfaro  
175 *et al.* 2009) (see Table 1), most studies report the recovered patterns without a focused examination  
176 of their scale-dependence. Focused examination of patterns across scales may precipitate the  
177 resolution of several outstanding controversies in the field.

178 One such controversy revolves around the dynamics of diversity and diversification. It  
179 has been debated whether the dynamics are expansionary, such that regional and clade diversity  
180 accumulate constantly over time (Benton & Emerson 2007; Wiens 2011; Harmon & Harrison

181 2015), or whether the dynamics are ecologically limited, such that diversity tends toward an  
182 equilibrium (Rabosky 2009; Rabosky & Hurlbert 2015). Empirical evidence suggests that genera  
183 with dozens of species often expand in terms of their diversity (McPeck 2008; Morlon *et al.* 2010)  
184 whereas higher taxa with thousands of species are mostly saturated at their equilibrium diversity  
185 (Vamosi & Vamosi 2010; Rabosky *et al.* 2012). Island radiations and fossil evidence also indicate  
186 that clades often expand, seemingly without bounds, during the initial phases of their  
187 diversification but eventually reach an equilibrium and saturate (Alroy 1996; Benton & Emerson  
188 2007; Glor 2010; Quental & Marshall 2013). It is therefore possible that diversification varies  
189 systematically across phylogenetic scales such that seemingly contradictory dynamics (i.e.  
190 expansionary and equilibrial) might be detected across different segments of the same phylogeny.  
191 If that were the case, the debate as to whether the dynamics are expansionary or equilibrial might  
192 not prove particularly productive and should perhaps be reframed in terms of phylogenetic scale  
193 (e.g. phylogenetic scales over which the different dynamics prevail, scale-related factors that  
194 determine the shift between the dynamics, how the dynamics combine across scales and across  
195 nested clades of different ages and sizes).

196 Evolutionary disparification may also vary across the phylogeny because traits  
197 (phenotypic, behavioral, but also molecular) diverge at different rates and therefore are  
198 conserved over different phylogenetic scales (Freckleton *et al.* 2002; Blomberg *et al.* 2003; Wiens &  
199 Graham 2005). Even though the dynamics of trait divergence and niche conservatism have been  
200 the subject of much research (e.g. Blomberg *et al.* 2003; Freckleton *et al.* 2002), clear generalizations  
201 about their scale-dependence have not yet emerged. In most cases, physiological traits that largely  
202 determine the extent of species distributions seem conserved over extensive phylogenetic scales  
203 (Freckleton *et al.* 2002; Blomberg *et al.* 2003) while habitat- and diet-related traits that mediate  
204 species coexistence locally seem generally labile and conserved over small scales (Ackerly *et al.*  
205 2006; Buckley *et al.* 2010). However, the opposite pattern has also been observed where  
206 physiological tolerances were conserved over small scales while habitat, diet, body size, and  
207 feeding method remained unchanged for most of a clade's history (Kennedy *et al.* 2012; Price *et*  
208 *al.* 2014).

209 These mixed results suggest that temporal scale may be insufficient to fully capture the  
210 variance in niche conservatism. Phylogenetic scale, in contrast, captures the fact niches and traits



211 may evolve at different rates even across closely related clades (e.g. due to clade-specific selection  
212 regimes, genetic architecture, pleiotropy) that span similar temporal scales but different  
213 phylogenetic scales (e.g. one clade has undergone an explosive radiation on an island while the  
214 other has accumulated only limited morphological, ecological, and species diversity on the  
215 mainland). In these cases, time will not capture the phylogenetic hierarchy as well as phylogenetic  
216 scale would (e.g. phylogenetic domains defined to reflect clade size, phenotypic and ecological  
217 divergence) (see below). The concept of phylogenetic scale may therefore encourage a more  
218 realistic and potentially more accurate way of thinking about trait evolution and niche  
219 conservatism.

220

### 221 **Community ecology**

222 Patterns of community phylogenetic structure, and hence the inferred processes that shape  
223 communities, can vary with phylogenetic scale (Webb *et al.* 2002; Cavender-Bares *et al.* 2009;  
224 Vamosi *et al.* 2009; Münkemüller *et al.* 2014). Even though community phylogeneticists have long  
225 been aware of this fact (Webb *et al.* 2002; Cavender-Bares *et al.* 2009), most studies routinely do  
226 not recognize the influence of phylogenetic scale on their results.

227 To study the phylogenetic structure of a community, researchers calculate standardized  
228 community metrics (e.g. the net relatedness index, NRI) based on null models which assemble  
229 random communities from the regional pool of species. Phylogenetic delimitation of the species  
230 pool can influence these metrics profoundly and inform us about the mechanisms that mediate  
231 local coexistence of differently delimited suites of species (Cavender-Bares *et al.* 2009; Lessard *et*  
232 *al.* 2012; Cornell & Harrison 2014). For example, communities of mutually unrelated species that  
233 have been selected from a broadly defined species pool are typically shaped by environmental  
234 filters (Parra *et al.* 2011; Cavendar-Bares *et al.* 2009) while narrowly defined pools often uncover  
235 signatures of competition, mutualism, or dispersal limitation, among the closely related and  
236 locally coexisting species (Swenson *et al.* 2007; Cavender-Bares *et al.* 2009; Parra *et al.* 2011).

237 The interpretation of community structure has been under increasing scrutiny lately  
238 because different processes can produce similarly-structured communities (e.g. Mayfield &  
239 Levine 2010; Gerhold *et al.* 2015) and a single metric may not capture community structure  
240 sufficiently to identify the processes that produced the community (Gerhold *et al.* 2015). We argue

241 that using multiple metrics across phylogenetic scales, as illustrated by some recently developed  
242 statistical approaches (Leibold *et al.* 2010; Pavoine *et al.* 2010; Borregaard *et al.* 2014), could be a  
243 particularly powerful strategy to capture community structure more completely and disentangle  
244 the interplay of processes behind it. Moreover, we would also recommend that the results are  
245 complemented by experimental work whenever possible (Cadotte *et al.* 2013; Godoy *et al.* 2014).  
246 Community ecology represents one of the disciplines where patterns and processes have already  
247 been analyzed in relation to phylogenetic scale, illustrating the theoretical and empirical potential  
248 of the concept. Further advances on this front are certainly possible (e.g. multiple metrics across  
249 phylogenetic scales) and hold the promise of a more conclusive interpretation of community-  
250 level patterns and the processes behind them.

251

## 252 **Biogeography and niche conservatism**

253 Biogeographic patterns, such as species distributions and diversity gradients, are largely shaped  
254 by the conservatism of the ecological niche (Wiens & Graham 2005; Wiens *et al.* 2010), which  
255 varies across the different dimensions of the niche and across phylogenetic scales (Freckleton *et al.*  
256 *et al.* 2002; Wiens & Graham 2005). Instead of studying whether niches are conserved or not  
257 (Freckleton *et al.* 2002; Wiens & Graham 2005; Losos 2008; Wiens 2008), we should perhaps  
258 identify the scales over which they are conserved and study the imprints of these phylogenetic  
259 scales in biogeographic patterns.

260 Diversity gradients vary dramatically across taxa (Fig. 1), presumably because the taxa's  
261 climatic niches are conserved over different phylogenetic scales (Wiens & Donoghue 2004;  
262 Buckley *et al.* 2010). In mammals, many of the ancient lineages have failed to colonize high  
263 latitudes (e.g. treeshrews, sloths, armadillos) presumably because their physiological tolerances  
264 have been conserved over larger phylogenetic scales than those of the lineages that have not only  
265 invaded high latitudes but also accumulated most of their diversity there (e.g. rabbits and hares)  
266 (Buckley *et al.* 2010), producing reverse latitudinal gradients (e.g. Cook 1969; Owen & Owen 1974;  
267 Buckley *et al.* 2003; reviewed in Kindlman *et al.* 2007). The occasional breakdowns of niche  
268 conservatism, which typically span only a short period in the history of a clade and limited  
269 phylogenetic scales, sometimes precipitate diversification episodes that significantly enrich the  
270 diversity of the regional biota (e.g. African cichlids, Madagascan vangas, or ray-finned fishes and

271 angiosperm plants) (Gavrilets & Losos 2009; Glor 2010; Jonsson *et al.* 2012; Rabosky *et al.* 2013).  
272 The phylogenetic scale over which niches are conserved, or break away from the conservatism,  
273 may consequently contribute to the formation of diversity patterns.

274 Diversity patterns may be further influenced by the effects of niche conservatism on  
275 regional extinctions (Cahill *et al.* 2012). Many genera whose climatic niches were conserved over  
276 phylogenetic scales that extended beyond the timeframe of the climatic changes during  
277 Pleistocene were wiped out by these changes (e.g. North American trees, European megafauna)  
278 (Stuart 1991; Jackson & Weng 1999). Yet, Pleistocene changes in climate have exterminated only  
279 few families, perhaps because climatic niches are less conserved at the family-level than at the  
280 genus-level (Freckleton *et al.* 2002; Blomberg *et al.* 2003). The extinction footprint of climate change  
281 therefore likely depends on the phylogenetic scale at which climatic niches are conserved.  
282 Evaluating scale-dependent vulnerability to extinction seems particularly relevant in the face of  
283 the on-going worldwide changes in climate and land use, and the results might provide insights  
284 into the patterns of loss of phylogenetic diversity. Even though it has long been recognized that  
285 niches are conserved to varying degrees, few studies have systematically investigated this  
286 variation across phylogenetic scales despite the promise that such an investigation could advance  
287 our understanding of diversity patterns.

288

## 289 **Macroecology**

290 Macroecologists, concerned mostly with statistical patterns across large spatial and temporal  
291 scales, rarely consider phylogenetic scale in their research. Yet, cross-scale comparisons can  
292 identify statistical patterns (e.g. latitudinal diversity gradient, body size distributions, species-  
293 area relationship, species-abundance distributions) that are truly universal and those that  
294 disintegrate over certain phylogenetic scales (Marquet *et al.* 2004; Storch & Šizling 2008).  
295 Phylogenetic scale may therefore inform us about the generality of statistical patterns in ecology  
296 and about the mechanisms (e.g. mathematical, geometric, random sampling, or biological) that  
297 likely produced them (Marquet *et al.* 2004; McGill 2008).

298 Some of the patterns originally considered to be universal have later been reported to  
299 disintegrate across phylogenetic scales. The latitudinal diversity gradient provides a very  
300 intuitive example, where the pattern holds across most higher taxa (e.g. mammals, birds,

301 amphibians, reptiles, plants) but often breaks down across their constituent lower taxa that  
302 encompass limited phylogenetic scales (e.g. penguins, hares, aphids, ichneumonids, Proteacea)  
303 and produce a variety of diversity gradients, including reverse ones (e.g. Cook 1969; Owen &  
304 Owen 1974; Buckley *et al.* 2003; reviewed in Kindlman *et al.* 2007) (Fig. 1a). Likewise, species  
305 abundance and body mass are negatively correlated across birds and mammals (Damuth 1981),  
306 but the correlation disappears across narrowly defined taxa (Isaac *et al.* 2011) and becomes even  
307 positive in some tribes of birds (Cotgreave 1994) (Fig. 1b). These changes in correlation  
308 coefficients across phylogenetic scales implicate the mechanisms behind the correlation. Within  
309 large phylogenetic extents, small-bodied species are locally abundant because their low metabolic  
310 requirements raise the carrying capacities of their populations (Gaston and Blackburn 1997).  
311 However, within restricted extents, local abundance becomes constrained by competition  
312 between closely related species, and large-bodied species become locally abundant because of  
313 their competitive superiority, thus reversing the directionality of the correlation between body  
314 size and population abundance across phylogenetic scales (Cotgreave 1994) (Fig. 1b).

315         Moreover, the species-area relationship (SAR) and species-abundance distribution (SAD)  
316 were traditionally believed to universally conform to certain mathematical forms (the power-law  
317 function and the lognormal distribution, respectively) (Preston 1948; Rosenzweig 1995).  
318 However, if two sister clades follow power-law SARs and lognormal SADs which differ in their  
319 parameters, it can be proven mathematically that the clade containing both sister taxa cannot  
320 follow either the power-law SAR or the lognormal SAD (Storch & Šizling 2008; Šizling *et al.* 2009).  
321 Even though some of these patterns represent classic examples of ecological laws, cross-scale  
322 analyses indicate that they are not truly universal and sometimes provide insights into the  
323 biological mechanisms behind them.

324         The fact that some statistical patterns disintegrate across phylogenetic scales implies that  
325 the theories to explain these patterns, based on the universal principles of geometry and  
326 mathematics, might be fundamentally ill-founded (Storch & Šizling 2008). It is also possible that  
327 the theories pertain to certain phylogenetic scales only. This would suggest that phylogenetic  
328 scales form phylogenetic domains (Box 2) within which the processes hypothesized by our  
329 theories operate. However, the boundaries of these phylogenetic domains remain largely  
330 unexplored, and their empirical delimitation might further inform the theory (see Box 2).

331 **BOX 2: Research across phylogenetic scales**

332 Many attributes, such as diversification rate, niche conservatism, or community structure, vary  
333 across phylogenetic scales (Table 1). They may vary in three different ways:

334 **(a) Scale dependence** refers to the situation when the studied attribute varies across phylogenetic  
335 scales without any obvious trend. In this case, the suitable scale of investigation should be defined  
336 a priori, based on the objective of the study. The results from one scale will be difficult to  
337 extrapolate to other scales.

338 **(b) Scaling** occurs when the attribute of interest varies systematically along the scale axis. The  
339 interpretation of scaling is at least threefold, depending on the underlying mechanism (note that  
340 only one of the interpretations is biological):

341 1. **Statistical scaling** is a sample-size effect whereby the statistical power of the analysis increases  
342 with clade size. Consequently, the attribute under study appears to change systematically  
343 from small clades to large clades (e.g. Machac et al. 2013). While the inferred values of the  
344 attribute itself may be technically correct, their systematic variation across scales is  
345 biologically irrelevant.

346 2. **Methodological artifacts** result when a statistical analysis becomes increasingly misleading  
347 toward the deep nodes of the phylogeny, resulting in incorrect and potentially biased  
348 estimates for the attribute of interest (e.g. ancestral reconstructions under dispersal-  
349 vicariance models tend to suggest that the ancestor occupied all of the regions examined)  
350 (Ronquist 1997). Methodological artifacts can be mitigated under various statistical  
351 corrections or when the results are validated using supplementary data, such as fossils.

352 3. **Phylogenetic scaling in the strict sense** occurs when the studied attribute changes across scales  
353 because the underlying biological process changes. True scaling can therefore inform us  
354 about the processes which generate the patterns observed across scales. If the scaling can be  
355 described mathematically, it allows to extrapolate across scales, even those not included in  
356 the original study, i.e. *downscale* or *upscale* the patterns under study.

357 **(c) Domains of scale** refer to the segments of the phylogeny (e.g. taxonomic units, tree depth,  
358 distinct clades) within which the attribute of interest appears relatively unchanged. The attribute  
359 might change abruptly between domains, indicating changes in the underlying biological

360 processes. Therefore, it should be possible to extrapolate across phylogenetic scales within  
361 domains, but not across scales between them.

362

363 **FIGURE (BOX 2):** Numerous attributes can be studied across phylogenetic scales. These may  
364 include diversification measures, statistical relationships between ecological variables,  
365 parameters of frequency distributions, metrics that describe community phylogenetic structure,  
366 or measures of niche conservatism (see Table 1). Phylogenetic scale can be defined in terms of  
367 clade age, clade size, taxonomic rank, the degree of molecular or phenotypic divergence, etc.,  
368 depending on the question under study.

369

370

371

372

373

374

375

376

377

378

379

380

381

382

383

384

385

386

387

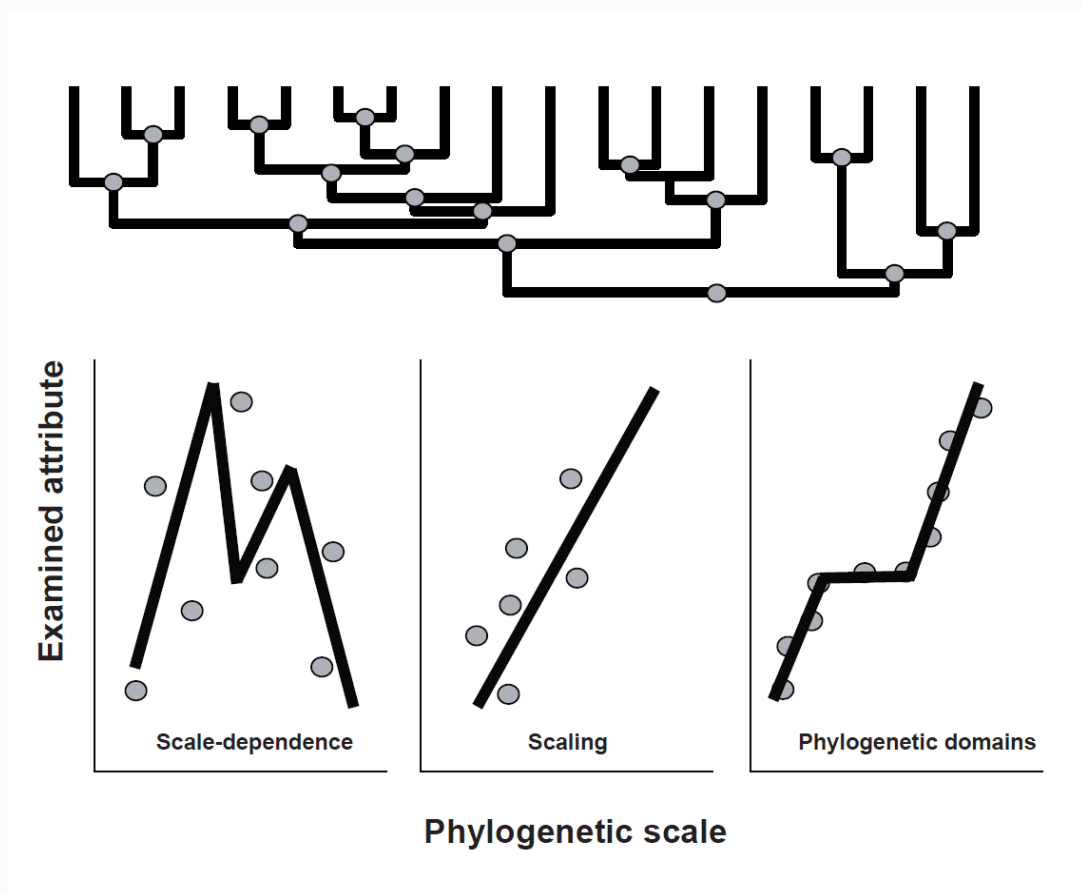

388 **Table 1.** Ecological and evolutionary attributes that vary across phylogenetic scales. Examples of  
 389 methods to evaluate these attributes are also indicated.

| <b>Field</b>                         | <b>Examined attribute</b> | <b>Examples of methods for evaluation</b>                                                                        |
|--------------------------------------|---------------------------|------------------------------------------------------------------------------------------------------------------|
| <b>Evolution and diversification</b> | diversification mode      | coalescent inference to distinguish between accelerations, slowdowns, and saturation (Morlon <i>et al.</i> 2010) |
|                                      | diversification rate      | product-moment estimators (Magallon & Sanderson 2001), equal-splits measures (Jetz <i>et al.</i> 2012)           |
|                                      | slowdown strength         | gamma statistic (Pybus & Harvey 2000)                                                                            |
| <b>Community ecology</b>             | community structure       | phylogenetics (NRI, NTI, MNND, MPD) (Webb <i>et al.</i> 2002)                                                    |
|                                      | phylogenetic diversity    | Faith's PD (Faith 1992)                                                                                          |
| <b>Biogeography and macroecology</b> | relationship form         | linear, polynomial, exponential, lognormal functions                                                             |
|                                      | relationship strength     | Pearson's correlation, Spearman's correlation, regression slope                                                  |
| <b>Niche conservatism</b>            | phylogenetic signal       | Pagel's lambda (Freckleton <i>et al.</i> 2002), Blomberg's K (Blomberg <i>et al.</i> 2003)                       |
|                                      | evolutionary rates        | Brownian motion model (Felsenstein 1985), Ornstein-Uhlenbeck model (Hansen 1997) of trait evolution              |

## 390 **PHYLOGENETIC SCALE IN PRACTICE**

391 The above overview demonstrates that the consideration of phylogenetic scale varies across  
392 fields, both in terms of the approach and the vocabulary. Therefore, it seems of value to find a  
393 common language to discuss and study phylogenetic scale across disciplines. There are two  
394 general approaches with which phylogenetic scale can be considered in ecological and  
395 evolutionary research. One is exploratory, where patterns are identified across a range of  
396 phylogenetic scales and then explained in the light of specific events or mechanisms. The other  
397 approach relies on testing a priori hypotheses, which are based on mechanisms that presumably  
398 take place at a given phylogenetic scale. Both approaches have their strengths and either may be  
399 appropriate, depending on the objective of a given study; however, we advocate the hypotheses  
400 testing approach for most questions.

401 To study the effects of phylogenetic scale, one can evaluate how a specific attribute of  
402 interest (such as diversification rate, niche conservatism, geographic distribution, statistical  
403 relationships) changes with phylogenetic scale. These attributes may vary randomly or  
404 systematically across the phylogeny, be more prevalent at particular scales, or stay unchanged  
405 across a discrete set of mutually nested clades (Box 2). We refer to the latter as a domain of  
406 phylogenetic scale which, in analogy to spatial domains (Wiens 1989), corresponds to a segment  
407 of phylogeny that reveals homogeneity in the attribute of interest. In this section, we consider  
408 conceptual and methodological approaches to explore patterns which are phylogenetic scale-  
409 dependent.

410

### 411 **Choice of phylogenetic scale**

412 While most researchers are aware that the choice of scale can influence inferences about patterns  
413 or processes, all too often the choice of scale, be it spatial, temporal or phylogenetic, is influenced  
414 by data availability or other logistical concerns. Instead, the scale of an investigation should be  
415 chosen based on a specific objective or question whenever possible. For example, phylogenies of  
416 higher taxa may not be appropriate for evaluating the processes of community assembly that  
417 typically take place at small phylogenetic scales. To test the hypothesis that competition reduces  
418 species coexistence, for example, small phylogenetic scales (e.g. genera, or generally clades where  
419 species can reasonably compete) should be preferred to large scales where most species are



420 highly unlikely to compete (e.g. the entire classes, such as birds and mammals). However, even  
421 with a specific question at hand, it can be difficult to choose a single most appropriate  
422 phylogenetic scale. Therefore, evaluating multiple phylogenetic extents or grains should be  
423 considered.

424

### 425 **Multiple phylogenetic scales**

426 Simultaneous consideration of multiple phylogenetic scales may be particularly important in  
427 large phylogenies because different clades within such phylogenies may show different patterns  
428 with respect to the attribute of interest (e.g. diversification rate, the strength of niche  
429 conservatism, patterns of community phylogenetic structure) (Fig. 1). For example, Cetacean  
430 systematists had long been perplexed as to why there is little correspondence between  
431 diversification dynamics estimated from the fossil record and phylogenetic trees (Quental &  
432 Marshall 2010; Slater *et al.* 2010; Morlon *et al.* 2011). The correspondence between the two datasets  
433 emerged only when diversification dynamics were evaluated independently for clades within  
434 cetaceans (whales, dolphins, and porpoises) as opposed to cetaceans as a whole. In this case, each  
435 clade appeared to have its own dynamics which were obscured when the entire tree was  
436 evaluated (Morlon *et al.* 2011).

437 In some cases, it may be difficult or even undesirable to specify, a priori, a specific set of  
438 scales. It might be instead more illuminating to study how the attribute of interest varies across  
439 an inclusive range of scales. There are several approaches, originating in community  
440 phylogenetics, which allow for such cross-scale analyses and return results for each node of the  
441 phylogenetic tree (Leibold *et al.* 2010; Pavoine *et al.* 2010; Borregaard *et al.* 2014). For example, the  
442 method developed by Borregaard *et al.* (2014) identifies nodes whose descendant clades  
443 underwent conspicuous geographic, phenotypic, or ecological shifts. In evolutionary research,  
444 evaluation of all nodes is not uncommon, and multiple tools have been developed to identify  
445 node-specific shifts in diversification rates and clades with conspicuously fast or slow  
446 diversification (Alfaro *et al.* 2009; Rabosky 2014) (Table 1). However, statistical analyses that  
447 would include all nodes of the phylogeny remain relatively scarce (e.g. Machac *et al.* 2012; Machac  
448 *et al.* 2013), and most studies analyze select clades only, despite the often cited concerns that the

449 selection of clades is rarely random, reflects our prior biases, and might influence the analysis  
450 profoundly (e.g. Phillimore & Price 2008; Cusimano & Renner 2010; Pennell *et al.* 2012).

451 Two potential issues associated with the evaluation of all nodes are data non-  
452 independence and nestedness. Non-independence can be readily accommodated by the widely  
453 used comparative methods (e.g. PIC, PGLS) (Hurlbert 1984; Felsenstein 1985; Freckleton *et al.*  
454 2002; Rohlf 2006). These methods typically estimate the same parameters as their conventional  
455 counterparts (e.g. intercepts, regression slopes, group means) but adjust the confidence intervals  
456 for these parameters based on the inferred degree of phylogenetic correlation in the data  
457 (Hurlbert 1984; Felsenstein 1985; Freckleton *et al.* 2002; Rohlf 2006). The nestedness of the data is  
458 more difficult to accommodate. For example, the diversification rate of a clade is inherently  
459 determined by the rate values across its constituent subclades. Nestedness therefore extends  
460 beyond the phylogenetic correlation of rate values and reflects how the value for a clade is  
461 produced by the subclade values. This information cannot be readily accommodated under the  
462 currently available comparative methods whose phylogenetic corrections consequently cannot  
463 guarantee proper estimates of statistical significance across nested data. For these reasons, we  
464 argue that parameter estimates can be extracted, compared, and analyzed across nested clades,  
465 but their significance needs to be interpreted cautiously. New theory that would illuminate how  
466 different attributes of interest (e.g. diversification rates, regression slopes, phylogenetic signal)  
467 combine and compound across nested hierarchies, as well as the methods to capture these  
468 correlations, are clearly needed.

469

### 470 **Phylogenetic scaling**

471 Statistical methods that evaluate all clades (nodes) in a given phylogeny (Leibold *et al.* 2010;  
472 Borregaard *et al.* 2014; Rabosky 2014) can be used to explore phylogenetic scaling. Scaling is a  
473 systematic trend along the scale axis in the attribute of interest. For example, diversification rate  
474 or net relatedness index (NRI) (Webb *et al.* 2002) may change systematically with increasing  
475 phylogenetic scale (Cavender-Bares *et al.* 2009; Vamosi *et al.* 2009).

476 Phylogenetic scaling should be most prevalent across mutually nested clades because the  
477 patterns associated with larger clades are determined by the patterns of clades nested within them  
478 (or vice versa). For example, diversification rate of a clade is determined by the rate values of its

479 subclades, similarly as species richness of a spatial plot is determined by the richness of its  
480 subplots. Consequently, it should be possible to predict the value of an attribute (e.g.  
481 diversification rate, regression slopes, phylogenetic signal) at a particular phylogenetic scale from  
482 the knowledge of those values across other scales, much like it is possible to estimate species  
483 richness within large geographic areas, based on the knowledge of richness within small areas  
484 (Harte *et al.* 2009; Storch *et al.* 2012). When characterized mathematically, phylogenetic scaling  
485 should allow for predictions across phylogenetic scales not covered by the phylogeny at hand  
486 (i.e. upscaling or downscaling).

487

### 488 **Domains of phylogenetic scale**

489 When moving along the scale axis, the values of an attribute might sometimes change abruptly.  
490 Such discontinuities provide the opportunity to delimit the domains of phylogenetic scale (Box 2).  
491 Domains are discrete segments of a phylogeny, such as monophyletic clades, taxonomic ranks,  
492 or tree depth, which show homogeneity in the attribute of interest (i.e. diversification rate,  
493 statistical correlation, or phylogenetic signal). By definition, the attribute stays largely unchanged  
494 within a domain but varies substantially between domains. Phylogenetic domains may therefore  
495 provide insights into the processes which operate over different segments of a phylogenetic tree.

496 Traditionally, phylogenetic domains were delimited by taxonomists whose objective was  
497 to organize species into biologically meaningful units, such as families, orders, or classes. These  
498 units are based mostly on morphological and ecological attributes. However, phylogenetic  
499 domains can also consist of clades that show diversification homogeneity, similar rates of  
500 morphological evolution, or similar life-history trade-offs. Therefore, the domains may be  
501 delimited based on key innovations, episodes of historical dispersals, or extinction events, but  
502 also statistically, using quantitative methods without the prior knowledge of the evolutionary  
503 history of a clade. While the statistical approach may be more transparent and reproducible, the  
504 resulting domains may be harder to interpret biologically. Nonetheless, statistically delimited  
505 domains may reveal otherwise unnoticed evolutionary events and potentially important breaks  
506 in the clade's history that may have shaped its extant diversity.

507 Phylogenetic domains may further facilitate statistical inference, given that most  
508 comparative methods assume that the analyzed attributes are largely homogeneous (e.g.

509 regression slopes do not vary across genera within the analyzed family, diversification is  
510 homogenous across the analyzed lineages) and return spurious results when applied to clades  
511 that show a mixture of patterns and processes (Morlon *et al.* 2011; O'Meara 2012; Rabosky &  
512 Goldberg 2015). Phylogenetic domains may therefore identify when comparative methods report  
513 reasonably reliable results and when their conclusions must be interpreted with caution because  
514 the results span different domains and the underlying assumptions have been violated.

515

## 516 CONCLUSION

517 It is well established that different processes dominate over different spatial and temporal scales.  
518 Phylogenetic scale, however, has received limited attention although much research in ecology  
519 and evolution relies on molecular phylogenies (Table 1). Explicit consideration of phylogenetic  
520 scale, scale dependence, phylogenetic scaling, and the domains of phylogenetic scale can  
521 therefore inform multiple disciplines in the field (e.g. diversification analysis, community  
522 ecology, biogeography and macroecology).

523 We have discussed phylogenetic scale largely in isolation from spatial and temporal  
524 scales, but these types of scale will often be related. For instance, competitive exclusion may be  
525 prominent among closely related species within local communities over short time periods  
526 (Cavender-Bares *et al.* 2009). In contrast, plate tectonics might influence deeper nodes in a  
527 phylogeny and operate over broad geographic and temporal scales (Ricklefs 1985; Willis &  
528 Whittaker 2002). In some notable cases, however, the scales may not be related. Diversity  
529 anomalies, such as New Caledonia or Madagascar, represent examples of decoupling where rich  
530 biotas that encompass extensive phylogenetic scales diversified in a relatively small region  
531 (Warren *et al.* 2010; Espeland & Murienne 2011). In contrast, recent radiations within grasses and  
532 rodents have had a large geographic footprint but encompass only limited phylogenetic scales  
533 (Edwards *et al.* 2010). Evaluating when different types of scale are coupled (or decoupled) may  
534 yield new insights into the evolutionary history of different clades and regions (Willis &  
535 Whittaker 2002).

536 We hope that the perspective presented here will spur further theoretical, empirical, and  
537 methodological research. Explicit consideration of phylogenetic scale may turn our focus away  
538 from the importance of particular mechanisms (diversification, trait evolution, niche

539 conservatism) toward the appreciation for the interplay of multiple processes which together, but  
540 over different phylogenetic scales, shape the diversity of life.

541

## 542 ACKNOWLEDGEMENTS

543 Funding was provided by the NSF program Dimensions of Biodiversity (DEB-1136586) and by  
544 the Grant Agency of the Czech Republic (14-36098G).

545

## 546 REFERENCES

547 Ackerly, D. D., D. W. Schwilk, and C. O. Webb. 2006. Niche evolution and adaptive radiation: testing the order of trait  
548 divergence. *Ecology* 87:50–61.

549 Alfaro, M. E., F. Santini, C. Brock, H. Alamillo, A. Dornburg, D. L. Rabosky, G. Carnevale, et al. 2009. Nine exceptional  
550 radiations plus high turnover explain species diversity in jawed vertebrates. *Proceedings of the National Academy  
551 of Sciences of the United States of America* 106:13410–13414.

552 Benton, M. J., and B. C. Emerson. 2007. How did life become so diverse? The dynamics of diversification according to  
553 the fossil record and molecular phylogenetics. *Palaeontology* 50:23–40.

554 Blomberg, S. P., T. Garland, and A. R. Ives. 2003. Testing for phylogenetic signal in comparative data: behavioral traits  
555 are more labile. *Evolution* 57:717–745.

556 Borregaard, M. K., C. Rahbek, J. Fjeldså, J. L. Parra, R. J. Whittaker, and C. H. Graham. 2014. Node-based analysis of  
557 species distributions. *Methods in Ecology and Evolution* 5:1225–1235.

558 Buckley, H. L., T. E. Miller, A. M. Ellison, and N. J. Gotelli. 2003. Reverse latitudinal trends in species richness of pitcher-  
559 plant food webs. *Ecology Letters* 6:825–829.

560 Buckley, L. B., T. J. Davies, D. D. Ackerly, N. J. B. Kraft, S. P. Harrison, B. L. Anacker, H. V. Cornell, et al. 2010.  
561 Phylogeny, niche conservatism and the latitudinal diversity gradient in mammals. *Proceedings of the Royal Society  
562 of London B: Biological Sciences*: rspb20100179.

563 Cadotte, M., C. H. Albert, and S. C. Walker. 2013. The ecology of differences: assessing community assembly with trait  
564 and evolutionary distances. *Ecology Letters* 16:1234–1244.

565 Cahill, A. E., M. E. Aiello-Lammens, M. C. Fisher-Reid, X. Hua, C. J. Karanewsky, H. Y. Ryu, G. C. Sbeglia, et al. 2012.  
566 How does climate change cause extinction? *Proceedings of the Royal Society B: Biological Sciences*: rspb20121890.

567 Cavender-Bares, J., A. Keen, and B. Miles. 2006. Phylogenetic structure of Floridian plant communities depends on  
568 taxonomic and spatial scale. *Ecology* 87:S109–122.

569 Cavender-Bares, J., K. H. Kozak, P. V. A. Fine, and S. W. Kembel. 2009. The merging of community ecology and  
570 phylogenetic biology. *Ecology Letters* 12:693–715.

571 Cook, R. E. 1969. Variation in species density of North American birds. *Systematic Zoology* 18:63–84.

572 Cornell, H. V., and S. P. Harrison. 2014. What are species pools and when are they important? *Annual Review of*

- 573 Ecology, Evolution, and Systematics 45:45–67.
- 574 Cotgreave, P., and P. Stockley. 1994. Body size, insectivory and abundance in assemblages of small mammals. *Oikos*  
575 71:89–96.
- 576 Damuth, J. 1981. Population density and body size in mammals. *Nature* 290:699–700.
- 577 Daniel L Rabosky, G. J. S. 2012. Clade age and species richness are decoupled across the Eukaryotic Tree of Life. *PLoS*  
578 *biology* 10:e1001381.
- 579 Edwards, E. J., C. P. Osborne, C. A. E. Strömberg, S. A. Smith, C4 Grasses Consortium, W. J. Bond, P.-A. Christin, et al.  
580 2010. The origins of C4 grasslands: integrating evolutionary and ecosystem science. *Science* 328:587–591.
- 581 Espeland, M., and J. Muriénne. 2011. Diversity dynamics in New Caledonia: towards the end of the museum model?  
582 *BMC Evolutionary Biology* 11:254.
- 583 Felsenstein, J. 1985. Phylogenies and the comparative method. *American Naturalist* 125:1–15.
- 584 Freckleton, R. P., P. H. Harvey, and M. Pagel. 2002. Phylogenetic analysis and comparative data: a test and review of  
585 evidence. *American Naturalist* 160:712–726.
- 586 Gaston, K. J., T. M. Blackburn, and J. H. Lawton. 1997. Interspecific Abundance-Range Size Relationships: An Appraisal  
587 of Mechanisms. *Journal of Animal Ecology* 66:579–601.
- 588 Gavrillets, S., and J. B. Losos. 2009. Adaptive radiation: Contrasting theory with data. *Science* 323:732–737.
- 589 Gerhold, P., J. F. Cahill, M. Winter, I. V. Bartish, and A. Prinzing. 2015. Phylogenetic patterns are not proxies of  
590 community assembly mechanisms (they are far better). *Functional Ecology* 29:600–614.
- 591 Glor, R. E. 2010. Phylogenetic insights on adaptive radiation. *Annual Review of Ecology, Evolution, and Systematics*  
592 41:251–270.
- 593 Godoy, O., N. J. B. Kraft, and J. M. Levine. 2014. Phylogenetic relatedness and the determinants of competitive  
594 outcomes. *Ecology Letters* 17:836–844.
- 595 Gould SJ. 2002. *The Structure of evolutionary theory*. Harvard University Press, Cambridge, MA.
- 596 Hansen, T. F. 1997. Stabilizing selection and the comparative analysis of adaptation. *Evolution* 51:1341–1351.
- 597 Harmon, L. J., and S. Harrison. 2015. Species diversity is dynamic and unbounded at local and continental scales.  
598 *American Naturalist* 185:584–593.
- 599 Harte, J., A. B. Smith, and D. Storch. 2009. Biodiversity scales from plots to biomes with a universal species–area curve.  
600 *Ecology Letters* 12:789–797.
- 601 Heath, T. A., J. P. Huelsenbeck, and T. Stadler. 2014. The fossilized birth–death process for coherent calibration of  
602 divergence-time estimates. *Proceedings of the National Academy of Sciences* 111:2957–2966.
- 603 Hurlbert, S. H. 1984. Pseudoreplication and the design of ecological field experiments. *Ecological Monographs* 54:187–  
604 211.
- 605 Isaac, N. J. B., D. Storch, and C. Carbone. 2011. Taxonomic variation in size–density relationships challenges the notion  
606 of energy equivalence. *Biology Letters* 7:615–618.
- 607 IUCN 2016. *The IUCN Red List of Threatened Species*.
- 608 Jackson, S. T., and C. Weng. 1999. Late Quaternary extinction of a tree species in eastern North America. *Proceedings*

- 609 of the National Academy of Sciences of the United States of America 96:13847–13852.
- 610 Lessard, J. P. 2012. Inferring local ecological processes amid species pool influences. *Trends in Ecology & Evolution*
- 611 27:600–607.
- 612 Jones, K. E., J. Bielby, M. Cardillo, S. A. Fritz, J. O'Dell, C. D. L. Orme, K. Safi, et al. 2009. PanTHERIA: a species-level
- 613 database of life history, ecology, and geography of extant and recently extinct mammals. *Ecology* 90:2648–2648.
- 614 Jönsson, K. A., P.-H. Fabre, S. A. Fritz, R. S. Etienne, R. E. Ricklefs, T. B. Jørgensen, J. Fjeldså, et al. 2012. Ecological and
- 615 evolutionary determinants for the adaptive radiation of the Madagascan vangas. *Proceedings of the National*
- 616 *Academy of Sciences of the United States of America* 109:6620–6625.
- 617 Kennedy, J. D., J. T. Weir, D. M. Hooper, D. T. Tietze, J. Martens, and T. D. Price. 2012. Ecological limits on
- 618 diversification of the Himalayan Core Corvoidea. *Evolution* 66:2599–2613.
- 619 Kindlman, P., Schodellbauerova, I. & Dixon, A.F.G. (2007). Inverse latitudinal gradients in species diversity. In: *Scaling*
- 620 *Biodiversity*, eds. Storch, D., Marquet, P.A. & Brown, J. H. Cambridge University Press, Cambridge.
- 621 Kindlman, Schodellbauerova, and Dixon. 2007. Inverse latitudinal gradients in species diversity. In: *Scaling*
- 622 *Biodiversity*, ed. David Storch, Pablo A. Marquet and James H. Brown. Cambridge University Press.
- 623 Kozak, K. H., and J. J. Wiens. 2010. Accelerated rates of climatic-niche evolution underlie rapid species diversification.
- 624 *Ecology Letters* 13:1378–1389.
- 625 Laland, K., T. Uller, M. Feldman, K. Sterelny, G. B. Müller, A. Moczek, E. Jablonka, et al. 2014. Does evolutionary theory
- 626 need a rethink? *Nature* 514:161–164.
- 627 Leibold, M. A., E. P. Economo, and P. Peres-Neto. 2010. Metacommunity phylogenetics: separating the roles of
- 628 environmental filters and historical biogeography. *Ecology Letters* 13:1290–1299.
- 629 Levin, S. A. 1992. The Problem of Pattern and Scale in Ecology: The Robert H. MacArthur Award Lecture. *Ecology*
- 630 73:1943–1967.
- 631 Losos, J. B. 2008. Phylogenetic niche conservatism, phylogenetic signal and the relationship between phylogenetic
- 632 relatedness and ecological similarity among species. *Ecology Letters* 11:995–1003.
- 633 Machac, A., Graham, C.H. & Storch, D. Ecological controls of mammalian diversification vary with phylogenetic scale,
- 634 in review.
- 635 Machac A., Storch D., Wiens J. J. (2013) Ecological causes of decelerating diversification in carnivoran mammals.
- 636 *Evolution* 67: 2423-2433.
- 637 Machac A., Storch D., Zrzavy J., Smrckova J. (2012) Temperature dependence of evolutionary diversification:
- 638 differences between two contrasting model taxa support the metabolic theory of ecology. *Journal of Evolutionary*
- 639 *Biology* 25: 2449-2456.
- 640 Marquet, P.A., M. Fernández, S.A. Navarrete & C. Valdovinos (2004) Diversity emerging: Towards a deconstruction of
- 641 biodiversity patterns. In: *Frontiers of Biogeography: New Directions in the Geography of Nature*. Cambridge
- 642 University Press, Cambridge.
- 643 May, R. M. 1974 *Patterns of species abundance and diversity*. Harvard University Press.
- 644 Mayr E. 1942. *Systematics and the origin of species*. Dover, New York.

- 645 McGill, B. J., A. E. K. Roy, and E. M. C. Whitlock. 2008. Exploring Predictions of Abundance from Body Mass Using  
646 Hierarchical Comparative Approaches. *American Naturalist* 172:88–101.
- 647 McGuire, J. A., C. C. Witt, J. V. Remsen Jr., A. Corl, D. L. Rabosky, D. L. Altshuler, and R. Dudley. 2014. Molecular  
648 phylogenetics and the diversification of hummingbirds. *Current Biology* 24:910–916.
- 649 McPeck, M. A. 2008. The ecological dynamics of clade diversification and community assembly. *American Naturalist*  
650 172:270–284.
- 651 Morlon, H., T. L. Parsons, and J. B. Plotkin. 2011. Reconciling molecular phylogenies with the fossil record. *Proceedings*  
652 *of the National Academy of Sciences* 108:16327–16332.
- 653 Morlon, H., M. D. Potts, and J. B. Plotkin. 2010. Inferring the dynamics of diversification: a coalescent approach. *PLoS*  
654 *biology* 8.
- 655 Münkemüller, T., L. Gallien, S. Lavergne, J. Renaud, C. Roquet, S. Abdulhak, S. Dullinger, et al. 2014. Scale decisions  
656 can reverse conclusions on community assembly processes. *Global ecology and biogeography* 23:620–632.
- 657 Munoz, F., B. R. Ramesh, and P. Coutron. 2014. How do habitat filtering and niche conservatism affect community  
658 composition at different taxonomic resolutions? *Ecology* 95:2179–2191.
- 659 Ndiribe, C., L. Pellissier, S. Antonelli, A. Dubuis, J. Pottier, P. Vittoz, A. Guisan, et al. 2013. Phylogenetic plant  
660 community structure along elevation is lineage specific. *Ecology and Evolution* 3:4925–4939.
- 661 Nilsson, M. A., U. Arnason, P. B. S. Spencer, and A. Janke. 2004. Marsupial relationships and a timeline for marsupial  
662 radiation in South Gondwana. *Gene* 340:189–196.
- 663 O'Meara, B. C. 2012. Evolutionary inferences from phylogenies: a review of methods. *Annual Review of Ecology,*  
664 *Evolution, and Systematics* 43:267–285.
- 665 Owen, D., and J. Owen. 1974. Species diversity in temperate and tropical Ichneumonidae. *Nature* 249:583–584.
- 666 PanTHERIA: A species-level database of life history, ecology, and geography of extant and recently extinct mammals.  
667 *Ecology* 90:2648
- 668 Parra, J. L., J. A. McGuire, and C. H. Graham. 2010. Incorporating clade identity in analyses of phylogenetic community  
669 structure: an example with hummingbirds. *American Naturalist* 176:573–587.
- 670 Parra, J. L., C. Rahbek, J. A. McGuire, and C. H. Graham. 2011. Contrasting patterns of phylogenetic assemblage  
671 structure along the elevational gradient for major hummingbird clades. *Journal of Biogeography* 38:2350–2361.
- 672 Pavoine, S., M. Baguette, and M. B. Bonsall. 2010. Decomposition of trait diversity among the nodes of a phylogenetic  
673 tree. *Ecological Monographs* 80:485–507.
- 674 Pigliucci, M. 2007. Do we need an extended evolutionary synthesis? *Evolution* 61:2743–2749.
- 675 Preston, F. W. 1948. The commonness, and rarity of species. *Ecology* 29:254–283.
- 676 Price, T. D., D. M. Hooper, C. D. Buchanan, U. S. Johansson, D. T. Tietze, P. Alström, U. Olsson, et al. 2014. Niche filling  
677 slows the diversification of Himalayan songbirds. *Nature* 509:222–225.
- 678 Quental, T. B., and C. R. Marshall. 2010. Diversity dynamics: molecular phylogenies need the fossil record. *Trends in*  
679 *Ecology & Evolution* 25:434–441.
- 680 — — —. 2013. How the Red Queen drives terrestrial mammals to extinction. *Science* 341:290–292.



- 681 Rabosky, D. L. 2009. Ecological limits and diversification rate: alternative paradigms to explain the variation in species  
682 richness among clades and regions. *Ecology Letters* 12:735–743.
- 683 — — —. 2014. Automatic detection of key innovations, rate shifts, and diversity-dependence on phylogenetic trees.  
684 *PLoS ONE* 9:e89543.
- 685 Rabosky, D. L., and E. E. Goldberg. 2015. Model inadequacy and mistaken inferences of trait-dependent speciation.  
686 *Systematic Biology* syu131.
- 687 Rabosky, D. L., and A. H. Hurlbert. 2015. Species richness at continental scales is dominated by ecological limits. *The*  
688 *American Naturalist* 185:572–583.
- 689 Rabosky, D. L., and D. R. Matute. 2015. Macroevolutionary speciation rates are decoupled from the evolution of  
690 intrinsic reproductive isolation in *Drosophila* and birds.
- 691 Rabosky, D. L., F. Santini, J. Eastman, S. A. Smith, B. Sidlauskas, J. Chang, and M. E. Alfaro. 2013. Rates of speciation  
692 and morphological evolution are correlated across the largest vertebrate radiation. *Nature Communications* 4: 2958-  
693 2961.
- 694 Rabosky, D. L., G. J. Slater, and M. E. Alfaro. 2012. Clade age and species richness are decoupled across the eukaryotic  
695 tree of life. *PLoS biology* 10:e1001381.
- 696 Rohlf, F. J. 2001. Comparative methods for the analysis of continuous variables: geometric interpretations. *Evolution*  
697 55:2143–2160.
- 698 Rohlf, F. J. 2006. A comment on phylogenetic correction. *Evolution* 60:1509–1515.
- 699 Ronquist, F. 1997. Dispersal-vicariance analysis: a new approach to the quantification of historical biogeography.  
700 *Systematic Biology* 46:195–203.
- 701 Rosenzweig. 1995. Species diversity in space and time. Cambridge University Press.
- 702 Scheiner, S. M. 2000. Species richness, species–area curves and Simpson’s paradox. *Evolutionary Ecology Research*  
703 2:791–802.
- 704 Schneider, D. C. 2001. The rise of the concept of scale in ecology the concept of scale is evolving from verbal expression  
705 to quantitative expression. *BioScience* 51:545–553.
- 706 Šizling, A. L., W. E. Kunin, E. Šizlingová, J. Reif, and D. Storch. 2011. Between geometry and biology: the problem of  
707 universality of the species-area relationship. *American Naturalist* 178:602–611.
- 708 Slater, G. J., S. A. Price, F. Santini, and M. E. Alfaro. 2010. Diversity versus disparity and the radiation of modern  
709 cetaceans. *Proceedings of the Royal Society of B: Biological Sciences* 277:3097–3104.
- 710 Storch, D., P. Keil, and W. Jetz. 2012. Universal species-area and endemics-area relationships at continental scales.  
711 *Nature* 488:78–81.
- 712 Storch, D., and A. L. Šizling. 2008. The concept of taxon invariance in ecology: Do diversity patterns vary with changes  
713 in taxonomic resolution? *Folia Geobotanica* 43:329–344.
- 714 Stuart, A. J. 1991. Mammalian extinctions in the late Pleistocene of northern Eurasia and North America. *Biological*  
715 *Reviews of the Cambridge Philosophical Society* 66:453–562.
- 716 Swenson, N. G., B. J. Enquist, J. Pither, J. Thompson, and J. K. Zimmerman. 2006. The problem and promise of scale

- 717 dependency in community phylogenetics. *Ecology* 87:2418–2424.
- 718 Swenson, N. G., B. J. Enquist, J. Thompson, and J. K. Zimmerman. 2007. The influence of spatial and size scale on  
719 phylogenetic relatedness in tropical forest communities. *Ecology* 88:1770–1780.
- 720 Vamosi, J. C., and S. M. Vamosi. 2010. Key innovations within a geographical context in flowering plants: towards  
721 resolving Darwin’s abominable mystery. *Ecology Letters* 13:1270–1279.
- 722 Vamosi, S. M., S. B. Heard, J. C. Vamosi, and C. O. Webb. 2009. Emerging patterns in the comparative analysis of  
723 phylogenetic community structure. *Molecular Ecology* 18:572–592.
- 724 Warren, B. H., D. Strasberg, J. H. Bruggemann, R. P. Prys-Jones, and C. Thébaud. 2010. Why does the biota of the  
725 Madagascar region have such a strong Asiatic flavour? *Cladistics* 26:526–538.
- 726 Webb, C. O., D. D. Ackerly, M. A. McPeck, and M. J. Donoghue. 2002. Phylogenies and community ecology. *Annual*  
727 *Review of Ecology and Systematics* 33:475–505.
- 728 Wiens, J. A. 1989. Spatial scaling in ecology. *Functional Ecology* 3:385–397.
- 729 Wiens, J. J. 2008. Commentary on Losos (2008): Niche conservatism *deja vu*. *Ecology Letters* 11:1004–1005.
- 730 — — —. 2011. The causes of species richness patterns across space, time, and clades and the role of ecological limits. *The*  
731 *Quarterly Review of Biology* 86:75–96.
- 732 Wiens, J. J., D. D. Ackerly, A. P. Allen, B. L. Anacker, L. B. Buckley, H. V. Cornell, E. I. Damschen, et al. 2010. Niche  
733 conservatism as an emerging principle in ecology and conservation biology. *Ecology Letters* 13:1310–1324.
- 734 Wiens, J. J., and M. J. Donoghue. 2004. Historical biogeography, ecology and species richness. *Trends in Ecology &*  
735 *Evolution* 19:639–644.
- 736 Wiens, J. J., and C. H. Graham. 2005. Niche conservatism: integrating evolution, ecology, and conservation biology.  
737 *Annual Review of Ecology, Evolution, and Systematics* 36:519–539.
- 738 Willis, K. J., and R. J. Whittaker. 2002. Species diversity - scale matters. *Science* 295:1245–1248.
